# Supplementary figures and images for: Genome-Wide Identification and Characterization of the CC-NBS-LRR Gene Family in Cucumber (Cucumis sativus L.)
Source: MDPI journal article supplement (doi:10.3390/ijms23095048), 2022-05-02

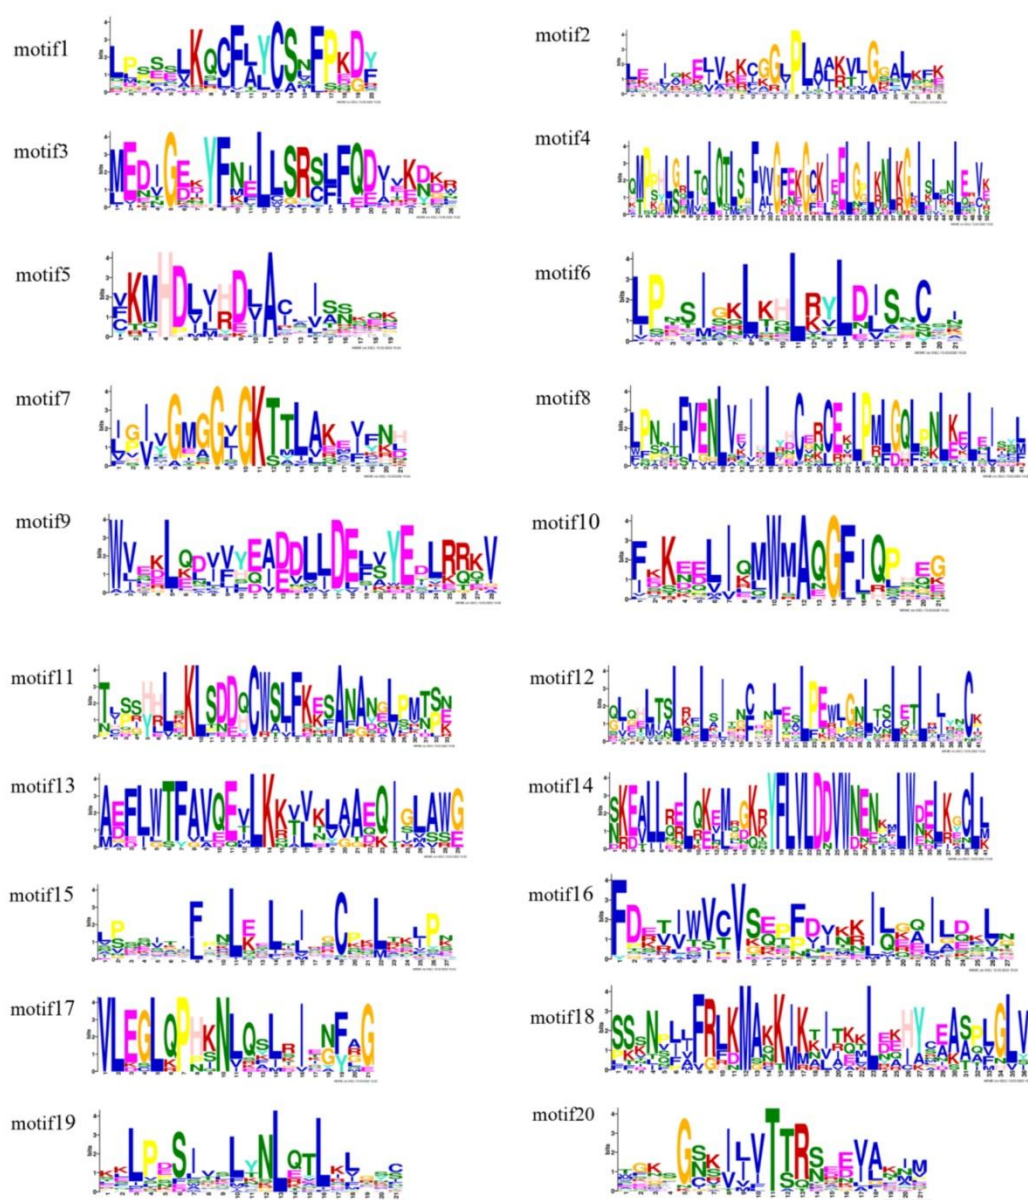

**Figure S1 The sequence logos of motifs in CsCC-NBS-LRR.**

Supplement: s1 [file s1]
